# Supplementary material
Source: PubMed Central journal article supplement (PMC9974165)
Supplement: mmc1.pdf [file mmc1.pdf]

***Appendix***

**Members of FLASH**

**Figure A1.** Patient Inclusion CONSORT

**Table A1.** Included Trial Summary

**Table A2.** Logistic Models for PFS24

**Table A3.** Survival Estimates using the definitions from the original NLCS paper

## Members of FLASH

| <b>Member</b>          | <b>Institution</b>                                                          |
|------------------------|-----------------------------------------------------------------------------|
| Christopher R. Flowers | University of Texas MD Anderson Cancer Center, Houston, TX                  |
| Nathan H. Fowler       | University of Texas MD Anderson Cancer Center, Houston, TX                  |
| Anton Hagenbeek        | Academic Medical Center, Amsterdam, the Netherlands                         |
| Michael Herold         | Leiter Onkologisches Zentrum                                                |
| Wolfgang Hiddemann     | Ludwig-Maximilians University Hospital, Munich, Germany                     |
| Eva Kimby              | Karolinska Institute, Stockholm, Sweden                                     |
| Marco Ladetto          | Azienda Ospedaliera SS Antonio e Biagio e Cesare Arrigo, Alessandria, Italy |
| Robert Marcus          | <b>HCA Healthcare London</b>                                                |
| Franck Morschhauser    | Service Université de Lille 2, Lille, France                                |
| Gilles Salles          | Memorial Sloan-Kettering Cancer Center, NY                                  |
| Umberto Vitolo         | Candiolo Cancer Institute, FPO-IRCCS, Torino, Italy                         |
| Emanuele Zucca         | Swiss Group for Clinical Cancer Research, Bern, Switzerland                 |
| Daniel J. Sargent      | Deceased; Mayo Clinic, Rochester, MN                                        |

**Figure A1. Patient Inclusion CONSORT**

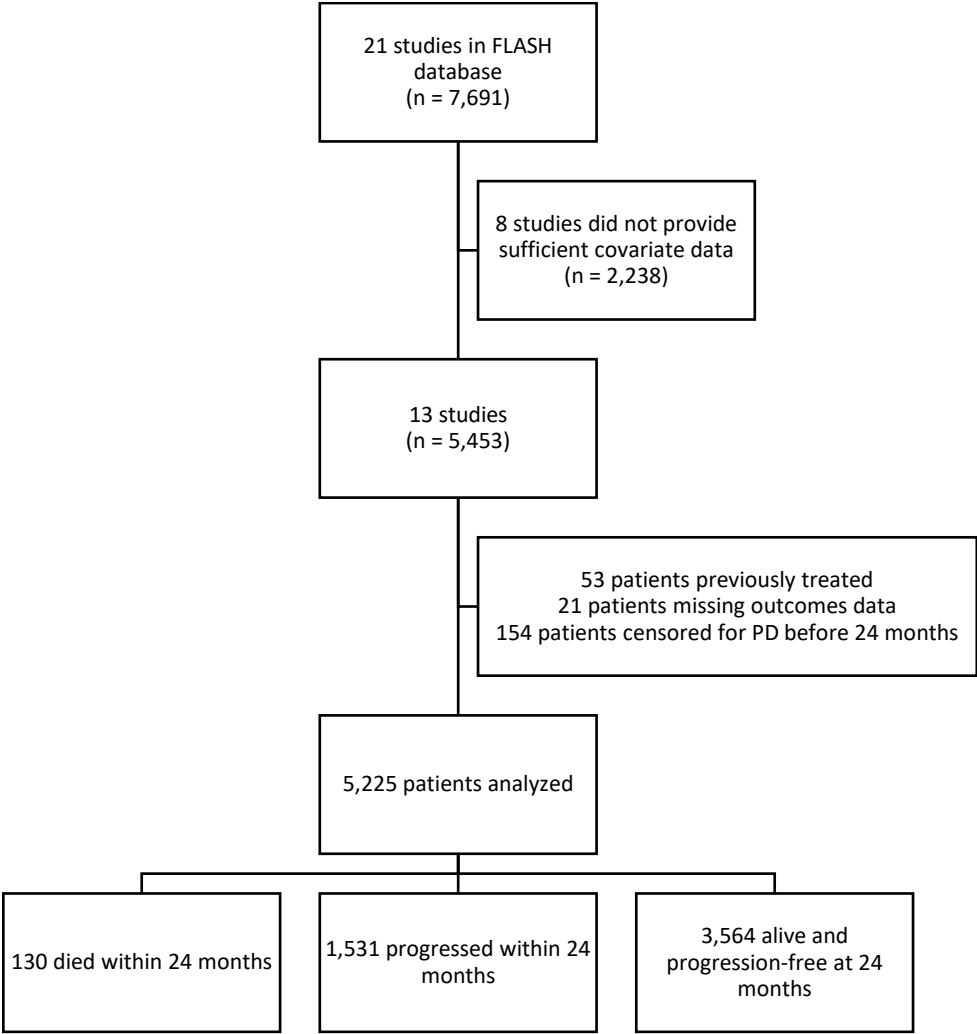

**Table A1. Included Trial Summary**

| <b>Study Name</b> | <b>Reference</b>                                          | <b>CT.gov<br/>Number</b> | <b>Regimen Used</b>   | <b>Accrual Period</b> | <b>Patients</b> |
|-------------------|-----------------------------------------------------------|--------------------------|-----------------------|-----------------------|-----------------|
| E1496             | Hochster, 2009                                            |                          | MR vs. Obs after CVP  |                       | 283             |
| FL2000            | Salles, 2008                                              | NCT00136552              | CHVP+I vs. R-CHVP+I   | May 2000 - May 2002   | 358             |
| GELF862           | Solal-Celigny, 1993<br>Solal-Celigny, 1998<br>Bachy, 2010 |                          | CHVP vs. CHVP+I       | Oct 1986 - Jun 1991   | 242             |
| GELF942           | Sebban, 2006                                              |                          | CHVP+I vs. CHOP+HDT   | Jul 1994 - Mar 2001   | 401             |
| GOELAMS064        | Gyan, 2009                                                | NCT00696735              | CHVP vs. VCAP+ASCT    | Apr 1994 - May 2001   | 166             |
| GLSG2000          | Hiddemann, 2005                                           |                          | CHOP vs. R-CHOP       | May 2000 - Jun 2010   | 953             |
| M39021            | Marcus, 2008                                              |                          | CVP vs. CVP+R         | Apr 2000 - Mar 2002   | 317             |
| OSHO39            | Herold, 2007                                              |                          | MCP vs. R-MCP         | Oct 1998 - Sep 2003   | 341             |
| ML16865           | Kimby, 2015                                               |                          | R vs. R+IFN           | Oct 2002 - Mar 2008   | 270             |
| ML17638           | Vitolo, 2013                                              | NCT01144364              | R vs Obs after R-FND  | Jan 2004 - Dec 2007   | 229             |
| GLSG1996          | Nickenig, 2006                                            |                          | CHOP vs. MCP          | May 1996 - Jul 2000   | 522             |
| OSHO19            | Herold, 2006                                              |                          | BOP vs. COP           | Apr 1994 - Oct 1998   | 144             |
| PRIMA             | Salles, 2010                                              | NCT00140582              | R vs. Obs maintenance | Jan 2005 - Apr 2007   | 999             |

**Table A2. Logistic Models for PFS24**

|                                 | Induction Treatment Regimen |                     |                     |                  |                     |                     |                    |                     |                     |                |                     |                     |
|---------------------------------|-----------------------------|---------------------|---------------------|------------------|---------------------|---------------------|--------------------|---------------------|---------------------|----------------|---------------------|---------------------|
|                                 | All Patients                |                     |                     | R-Chemo Patients |                     |                     | Rituximab Patients |                     |                     | Chemo Patients |                     |                     |
|                                 | Events/Total                | Odds Ratio (95% CI) | P-value             | Events/Total     | Odds Ratio (95% CI) | P-value             | Events/Total       | Odds Ratio (95% CI) | P-value             | Events/Total   | Odds Ratio (95% CI) | P-value             |
| <b>Tier 1</b>                   | 1524/4852                   |                     |                     | 489/2252         |                     |                     | 121/265            |                     |                     | 914/2335       |                     |                     |
| <b>Gender</b>                   |                             |                     | <.0001 <sup>2</sup> |                  |                     | 0.0024 <sup>2</sup> |                    |                     | 0.6005 <sup>2</sup> |                |                     | 0.0008 <sup>2</sup> |
| Female                          | 692/2383                    | Reference           |                     | 220/1120         | Reference           |                     | 63/140             | Reference           |                     | 409/1123       | Reference           |                     |
| Male                            | 832/2469                    | 1.33 (1.18-1.51)    | <.0001 <sup>1</sup> | 269/1132         | 1.38 (1.12-1.69)    | 0.0024 <sup>1</sup> | 58/125             | 1.14 (0.69-1.88)    | 0.6005 <sup>1</sup> | 505/1212       | 1.34 (1.13-1.59)    | 0.0008 <sup>1</sup> |
| <b>Performance Status</b>       |                             |                     | <.0001 <sup>2</sup> |                  |                     | 0.0031 <sup>2</sup> |                    |                     | 0.6770 <sup>2</sup> |                |                     | 0.0009 <sup>2</sup> |
| 0-1                             | 1379/4555                   | Reference           |                     | 447/2136         | Reference           |                     | 117/258            | Reference           |                     | 815/2161       | Reference           |                     |
| >=2                             | 145/297                     | 1.82 (1.43-2.32)    | <.0001 <sup>1</sup> | 42/116           | 1.83 (1.23-2.73)    | 0.0031 <sup>1</sup> | 4/7                | 1.39 (0.29-6.56)    | 0.6770 <sup>1</sup> | 99/174         | 1.72 (1.25-2.37)    | 0.0009 <sup>1</sup> |
| <b>FLIPI Risk Category</b>      |                             |                     | <.0001 <sup>2</sup> |                  |                     | <.0001 <sup>2</sup> |                    |                     | 0.0172 <sup>2</sup> |                |                     | <.0001 <sup>2</sup> |
| Low                             | 158/846                     | Reference           |                     | 54/383           | Reference           |                     | 11/39              | Reference           |                     | 93/424         | Reference           |                     |
| Intermediate                    | 468/1793                    | 1.52 (1.24-1.86)    | <.0001 <sup>1</sup> | 136/835          | 1.17 (0.83-1.65)    | 0.3728 <sup>1</sup> | 33/80              | 1.86 (0.80-4.29)    | 0.1470 <sup>1</sup> | 299/878        | 1.81 (1.38-2.37)    | <.0001 <sup>1</sup> |
| High                            | 898/2213                    | 2.92 (2.40-3.54)    | <.0001 <sup>1</sup> | 299/1034         | 2.45 (1.78-3.37)    | <.0001 <sup>1</sup> | 77/146             | 2.90 (1.34-6.32)    | 0.0072 <sup>1</sup> | 522/1033       | 3.54 (2.72-4.61)    | <.0001 <sup>1</sup> |
| <b>Tier 2</b>                   | 898/3088                    |                     |                     | 410/1873         |                     |                     | 104/233            |                     |                     | 384/982        |                     |                     |
| <b>Gender</b>                   |                             |                     | 0.0023 <sup>2</sup> |                  |                     | 0.0555 <sup>2</sup> |                    |                     | 0.4929 <sup>2</sup> |                |                     | 0.0100 <sup>2</sup> |
| Female                          | 425/1560                    | Reference           |                     | 192/940          | Reference           |                     | 55/126             | Reference           |                     | 178/494        | Reference           |                     |
| Male                            | 473/1528                    | 1.28 (1.09-1.51)    | 0.0023 <sup>1</sup> | 218/933          | 1.25 (0.99-1.56)    | 0.0555 <sup>1</sup> | 49/107             | 1.21 (0.71-2.06)    | 0.4929 <sup>1</sup> | 206/488        | 1.43 (1.09-1.87)    | 0.0100 <sup>1</sup> |
| <b>Performance Status</b>       |                             |                     | 0.0057 <sup>2</sup> |                  |                     | 0.1595 <sup>2</sup> |                    |                     | 0.6284 <sup>2</sup> |                |                     | 0.0264 <sup>2</sup> |
| 0-1                             | 822/2916                    | Reference           |                     | 379/1781         | Reference           |                     | 102/228            | Reference           |                     | 341/907        | Reference           |                     |
| >=2                             | 76/172                      | 1.58 (1.14-2.17)    | 0.0057 <sup>1</sup> | 31/92            | 1.39 (0.88-2.21)    | 0.1595 <sup>1</sup> | 2/5                | 0.63 (0.09-4.19)    | 0.6284 <sup>1</sup> | 43/75          | 1.76 (1.07-2.88)    | 0.0264 <sup>1</sup> |
| <b>FLIPI Risk Category</b>      |                             |                     | <.0001 <sup>2</sup> |                  |                     | <.0001 <sup>2</sup> |                    |                     | 0.0175 <sup>2</sup> |                |                     | <.0001 <sup>2</sup> |
| Low                             | 79/517                      | Reference           |                     | 49/338           | Reference           |                     | 8/34               | Reference           |                     | 22/145         | Reference           |                     |
| Intermediate                    | 265/1132                    | 1.61 (1.22-2.12)    | 0.0008 <sup>1</sup> | 110/680          | 1.04 (0.72-1.50)    | 0.8395 <sup>1</sup> | 27/68              | 2.22 (0.87-5.67)    | 0.0963 <sup>1</sup> | 128/384        | 2.65 (1.60-4.39)    | 0.0001 <sup>1</sup> |
| High                            | 554/1439                    | 2.98 (2.28-3.91)    | <.0001 <sup>1</sup> | 251/855          | 1.89 (1.32-2.69)    | 0.0005 <sup>1</sup> | 69/131             | 3.43 (1.42-8.24)    | 0.0060 <sup>1</sup> | 234/453        | 5.45 (3.30-9.02)    | <.0001 <sup>1</sup> |
| <b>Beta-2 Value at Baseline</b> |                             |                     | <.0001 <sup>2</sup> |                  |                     | <.0001 <sup>2</sup> |                    |                     | 0.1509 <sup>2</sup> |                |                     | 0.1711 <sup>2</sup> |
| Normal                          | 519/2123                    | Reference           |                     | 217/1286         | Reference           |                     | 75/182             | Reference           |                     | 227/655        | Reference           |                     |
| Elevated                        | 379/965                     | 1.49 (1.25-1.77)    | <.0001 <sup>1</sup> | 193/587          | 1.90 (1.49-2.42)    | <.0001 <sup>1</sup> | 29/51              | 1.63 (0.84-3.16)    | 0.1509 <sup>1</sup> | 157/327        | 1.23 (0.92-1.64)    | 0.1711 <sup>1</sup> |

<sup>1</sup>Covariate Wald p-value; <sup>2</sup>Type 3 Wald p-value;

**Table A3.** Survival Estimates using the definitions from the original NLCS paper

| <b>Population</b> | <b>Group</b> | <b>2-year<br/>Estimates</b> | <b>5-year<br/>Estimates</b> |
|-------------------|--------------|-----------------------------|-----------------------------|
| All Patients      | No-PD        | 96.3 (95.5-96.9%)           | 88.4 (87.1-89.6%)           |
|                   | PD           | 69.1 (66.6-71.5%)           | 53.1 (50.3-55.8%)           |
| R-Chemo           | No-PD        | 97.4 (96.5-98.1%)           | 90.7 (89.0-92.2%)           |
|                   | PD           | 74.2 (69.8-78.0%)           | 57.5 (52.5-62.3%)           |
| Rituximab         | No-PD        | 97.8 (93.3-99.3%)           | 95.6 (86.8-98.6%)           |
|                   | PD           | 83.4 (75.4-89.0%)           | 75.7 (65.3-83.4%)           |
| Chemo             | No-PD        | 94.8 (93.5-95.8%)           | 85.3 (83.2-87.2%)           |
|                   | PD           | 64.2 (60.8-67.4%)           | 47.6 (44.1-51.0%)           |
